1 **Deep conservation of histone variants in Thermococcales archaea**

2

3 Kathryn M Stevens<sup>1,2</sup>, Antoine Hocher<sup>1,2</sup>, Tobias Warnecke<sup>1,2\*</sup>

4

5 <sup>1</sup>Medical Research Council London Institute of Medical Sciences, London, United Kingdom

6 <sup>2</sup>Institute of Clinical Sciences, Faculty of Medicine, Imperial College London, London,

7 United Kingdom

8

9 \*corresponding author: [tobias.warnecke@lms.mrc.ac.uk](mailto:tobias.warnecke@lms.mrc.ac.uk)

10

## 1 **Abstract**

2

3 Histones are ubiquitous in eukaryotes where they assemble into nucleosomes, binding and  
4 wrapping DNA to form chromatin. One process to modify chromatin and regulate DNA  
5 accessibility is the replacement of histones in the nucleosome with paralogous variants.  
6 Histones are also present in archaea but whether and how histone variants contribute to the  
7 generation of different physiologically relevant chromatin states in these organisms remains  
8 largely unknown. Conservation of paralogs with distinct properties can provide *prima facie*  
9 evidence for defined functional roles. We recently revealed deep conservation of histone  
10 paralogs with different properties in the Methanobacteriales, but little is known  
11 experimentally about these histones. In contrast, the two histones of the model archaeon  
12 *Thermococcus kodakarensis*, HTkA and HTkB, have been examined in some depth, both *in*  
13 *vitro* and *in vivo*. HTkA and HTkB exhibit distinct DNA-binding behaviours and elicit unique  
14 transcriptional responses when deleted. Here, we consider the evolution of HTkA/B and their  
15 orthologs across the order Thermococcales. We find histones with signature HTkA- and  
16 HTkB-like properties to be present in almost all Thermococcales genomes. Phylogenetic  
17 analysis indicates the presence of one HTkA- and one HTkB-like histone in the ancestor of  
18 Thermococcales and long-term maintenance of these two paralogs throughout  
19 Thermococcales diversification. Our results support the notion that archaea and eukaryotes  
20 have convergently evolved histone variants that carry out distinct adaptive functions.  
21 Intriguingly, we also detect more highly diverged histone-fold proteins, related to those found  
22 in some bacteria, in several Thermococcales genomes. The functions of these bacteria-type  
23 histones remain entirely unknown, but structural modelling suggests that they can form  
24 heterodimers with HTkA/B-like histones.

## 1 Introduction

2

3 The ability of eukaryotic cells to respond to environmental change and regulate transcription  
4 relies on dynamic control of DNA accessibility through chromatin alterations. This involves  
5 many different processes, including the addition/removal of histone modifications and the  
6 exchange of histone proteins for paralogous variants. Such variants can modify structural  
7 properties of the nucleosome or change how it interacts with its binding partners (1–3). For  
8 example, macroH2A has a large C-terminal domain and precipitates transcriptional  
9 repression (2, 4) while cenH3, a fast-evolving H3 variant, is specifically localised to  
10 centromeres and involved in chromosome segregation (1, 5). Importantly, significant  
11 functional changes can come from small differences in sequence. H3.3, for example, is  
12 deposited in a replication-independent manner in actively transcribed regions of the genome  
13 (1) and important for mammalian development (6, 7), but differs from its paralog H3.1 by  
14 only five amino acid.

15

16 Histones are not exclusive to eukaryotes. Archaeal histone proteins, first discovered in  
17 *Methanothermobacter thermautotrophicus* (8, 9), have since been identified in diverse archaeal lineages (10,  
18 11) and are often highly expressed (11). Eukaryotic and archaeal histones share a conserved  
19 histone fold (HF) domain, form dimers and tetramers that are structurally very similar, and  
20 bind DNA non-specifically, albeit with a preference for more bendable sequences (12–16).  
21 Unlike eukaryotic histones, almost all archaeal histones lack long terminal extensions  
22 (“tails”) (10) but have the capacity to form homo- as well as heterodimers and to assemble  
23 into long oligomeric structures (16). These extended, flexible complexes (17) can, in theory,  
24 consist of different histone paralogs, providing opportunities for chromatin state modulation  
25 through the exchange of histones with different properties (18). In fact, many archaea encode  
26 two or more sequence-divergent histone paralogs, but whether these paralogs have defined  
27 functional roles akin to eukaryotic histone variants, and whether their expression and  
28 assembly change dynamically to mediate adaptive chromatin states, remains poorly  
29 understood.

30

31 What we do know from prior experimental work is that archaeal histone paralogs are more  
32 than mere copy number variants. The two histones of *M. thermautotrophicus* (HMfA, HMfB), for  
33 example, display differences in DNA binding affinity (19). Compared to HMfA, recombinant  
34 HMfB also induces more positive supercoiling upon binding to plasmid DNA and forms a

1 more compact complex as inferred from gel-shift and tethered particle motion experiments  
2 (20, 21). There are also differences between HMfA and HMfB in their relative expression  
3 during the growth cycle: in early exponential phase, HMfA is more highly expressed than  
4 HMfB, whose expression level increases towards stationary phase to reach an almost equal  
5 ratio between the two (20). The different properties of *M. fervidus* histones are consistent  
6 with the hypothesis that the two paralogs may have distinct functions in nucleoid biology, but  
7 whether the properties are physiologically relevant and affect organismal fitness has rarely  
8 been addressed explicitly.

9  
10 Recently, we considered this question using an evolutionary approach. We identified histone  
11 paralogs in the order Methanobacteriales that exhibit distinct structural properties and have  
12 been maintained over hundreds of millions of years (18), indicative of the importance of each  
13 individual paralog for fitness. Structural modelling identified histone variants that prevent  
14 stable tetramerization and might act as *capstones* that limit further extension when  
15 incorporated into a histone oligomer, providing a potential pathway to dynamically alter  
16 chromatin state. Are the Methanobacteriales unique or are there other clades of archaea with  
17 histone paralogs that have been maintained over long periods of time? And do these paralogs  
18 also show conserved and distinct structural properties?

19  
20 Here, we consider archaea in the order Thermococcales, which includes the model archaea  
21 *Pyrococcus furiosus* and *Pyrococcus abyssi* as well as *T. kodakarensis*, which has served as a  
22 model species for the *in vivo* study of archaeal histones. Thanks to the efforts of Santangelo  
23 and co-workers in particular, its two histones – HTkA (TK1413) and HTkB (TK2289) – are  
24 arguably the best characterized paralogs *in vivo*. Similar to HMfA and HMfB in *M. fervidus*,  
25 HTkA and HTkB can assemble into long oligomers both *in vitro* and *in vivo* (16, 17, 22, 23).  
26 The two histones differ from one another at 11 out of 67 residues (84% identity) and have  
27 several distinct properties. HTkA is the more highly expressed paralog, at least in exponential  
28 phase, where it makes up 1.1% of the proteome compared to 0.66% for HTkB (11). Together,  
29 they are abundant enough to coat the entire *T. kodakarensis* genome (24). HTkB has been  
30 shown to bind to DNA more strongly than HTkA and to form more compact complexes,  
31 which show faster migration during agarose gel electrophoresis (25). Deletion of each histone  
32 individually results in overlapping but distinct perturbations of the transcriptome (22, 26).  
33 Notably, HTkB-deficient cells exhibit reduced growth, possibly due to changes in the  
34 expression, not seen in strains lacking HTkA, of genes that encode translation factors and

1 ribosomal proteins (26). Deletion of *htkA* but not *htkB* leads to downregulation of  
2 hypothetical membrane proteins and prevents transformation of *T. kodakarensis*, suggesting  
3 HTkA alone plays a critical role in DNA uptake and/or integration (26).

4  
5 In this study, we show that histone paralogs with HTkA- and HTkB-like properties are  
6 present across the Thermococcales, including *Thermococcus*, *Pyrococcus*, and *Palaeococcus*  
7 *spp.*. We use structural modelling to show that, in most Thermococcales, HTkB-like histones  
8 are predicted to exhibit stronger DNA binding than those with HTkA-like properties.  
9 Phylogenetic analysis reveals that HTkA-like histones share a common ancestor to the  
10 exclusion of HTkB-like histones and *vice versa*, suggesting that the last common ancestor of  
11 the Thermococcales already encoded an HTkA-like and an HTkB-like histone, each of which  
12 has been maintained throughout the diversification of this clade for (very) approximately 750  
13 million years (27). The long-term preservation of these two paralogs across the order  
14 Thermococcales supports the notion that HTkA/B in *T. kodakarensis* (and their orthologs in  
15 other Thermococcales) make unique contributions to genome function and fitness. These  
16 findings add further evidence that histone variants exist in archaea, evolving in parallel to  
17 those in eukaryotes.

18  
19 Intriguingly, many Thermococcales archaea encode additional types of histone-fold proteins  
20 that are similar to histone-fold proteins found in some bacteria (28). One of these consists of  
21 an end-to-end duplication of the histone fold and is rarely found in archaea outside the  
22 Thermococcales. Within the Thermococcales, these bacteria-type histones are – while  
23 widespread – frequently lost, in contrast to HTkA/B. Their physiological roles remain  
24 unknown, but structural modelling suggest that they are able to heterodimerize with HTkA/B  
25 and might therefore further diversify histone-based chromatin states in these archaea.

## 26 27 28 **Results and Discussion**

29  
30 *Almost all Thermococcales have histone paralogs with HTkA- and HTkB-like properties*

31  
32 To identify putative histone proteins across the Thermococcales, we scanned 61 predicted  
33 proteomes using HMM models and iterative jackhmmer searches (see Methods). Histones  
34 with a single histone-fold domain (similar to canonical archaeal Hmf-like histones) were

1 found in all genomes (Fig 1c, Table S1). We also recovered putative histone-fold proteins  
2 similar to those found in some bacteria (28), which we discuss further below. A principal  
3 component analysis of the HMf-like archaeal histones based on their amino acid properties  
4 and isoelectric points (see Methods) suggests that histones can be assigned to one of two  
5 groups. One of these groups contains HTkA, the other HTkB (Fig 1a). This is consistent with  
6 a previous classification effort that also recovered two major groups of Thermococcales  
7 histones (29). Amino acid identities at several residues along the histone fold differ  
8 systematically between groups and are diagnostic of group membership. For example,  
9 tyrosine is always found at position 35 (Y35) in HTkA-like histones whereas HTkB-like  
10 histones have a positively charged lysine (K, 60 out of 62) or histidine (H, 2 out of 62).  
11 Similarly, glutamic acid at position 18 (E18) is present in 59 out of the 61 HTkA-like but  
12 none of the HTkB-like histones (Fig 1b).

13  
14 For some of these residues, we know from prior *in vitro* studies – as well as structural  
15 modelling – that amino acid identity can affect specific histone properties (18, 30). For  
16 example, substituting Y for K at residue 35 (the amino acids seen in HTkA- and HTkB-like  
17 histones, respectively), increases the stability of recombinant histone HFoB from  
18 *Methanobacterium formicicum* (31). In addition, evidence from mass spectrometry indicates  
19 that K35 in HTkB from *T. kodakarensis* and *Thermococcus gammatolerans* is acetylated *in*  
20 *vivo* (32) although stoichiometry and functional significance of this modification remain to be  
21 determined. A tyrosine at the same position in HTkA removes the potential for acetylation.  
22 E18 in HMfB forms an intermolecular salt bridge with K53, which helps to stabilise the  
23 interaction between monomers in the histone dimer (15, 33). Mutating E18 to proline does  
24 not alter DNA binding (30) but loss of the intermonomer salt bridge may result in less rigid  
25 dimer structures. Finally, having leucine (L) or phenylalanine (F) at residue 46 has no  
26 obvious effect on DNA binding in HMfA/B, but the residue, located at the interface between  
27 dimers, is important for tetramer formation (30, 34).

28  
29 We considered how amino acid differences between HTkA- and HTkB-like histones affect  
30 two key aspects of the histone-DNA complex: DNA affinity and tetramerization strength, a  
31 proxy for tetramer stability. Using a structural modelling approach, we find that predicted  
32 DNA binding for HTkB-like paralogs is, in most cases, stronger than for HTkA-like paralogs  
33 (Fig 1e, see Methods). This is in line with experimental findings that HTkB binds to DNA  
34 more tightly and forms a more compact complex with DNA than HTkA (25). In contrast,

1 predicted tetramerization strength does not strongly discriminate HTkA- from HTkB-like  
2 histones.

3

#### 4 *HtkA- and HtkB-like histones form ancient paralogous groups*

5

6 Almost all Thermococcales have both an HTkA-like and an HTkB-like histone (Fig 1c). This  
7 is consistent with (but not sufficient to demonstrate) ancient paralogy. To unravel the  
8 evolutionary history of Thermococcales histones, we used RaxML-NG (35) to build  
9 phylogenetic trees of all 123 canonical histones found across the 61 genomes in our analysis  
10 (see Methods). We find that HTkA-like and HTkB-like paralogs neatly separate into two  
11 groups defined by their position on the tree (Fig 1d). This pattern of separation indicates that  
12 one HTkA- and one HTkB-like histone were present in the last common ancestor of  
13 Thermococcales. The observation that both paralogs have been maintained along divergent  
14 Thermococcales lineages strongly suggests that at least some of the amino acid differences  
15 between them are functionally important and under selection, notwithstanding the fact that *T.*  
16 *kodakarensis* cells can tolerate the deletion of either histone under standard culture conditions  
17 (26). Along with our recent report of ancient histone paralogs in the Methanobacteriales (18),  
18 this finding provides further evidence that histone variants exist in archaea, evolving in  
19 parallel to those in eukaryotes.

20

#### 21 *Some Thermococcales encode histone-fold proteins similar to those found in bacteria*

22

23 Our survey also revealed that, alongside the HTkA/B-like histones, many Thermococcales  
24 genomes encode histone-fold proteins similar to those found in some bacteria (Fig 1c, Table  
25 S1), which harbour either a single or two (pseudodimeric) histone fold domains (28). We will  
26 refer to these as bacteria-type singlets and doublets, respectively. In contrast to HTkA/B-like  
27 histones their distribution across the Thermococcales is noticeably patchier and neither type  
28 is present in the closest sister clades (Methanofastidiosia, Theionarchaea). Looking more  
29 widely across archaea, the bacteria-type doublets are additionally only found in  
30 Methanocaldococcus and Archaeoglobus species (Hocher *et al.* in preparation), which are  
31 also hyperthermophiles, suggesting that the last common ancestor of the Thermococcales  
32 likely acquired this gene via horizontal transfer. These predicted histone-fold proteins have  
33 only recently been recognized and await functional characterization. The only functional data  
34 we have at present comes from transcriptome/proteome profiling: the relative expression

1 levels of these genes in *T. kodakarensis* (singlet: TK1040; doublet: TK0750) are lower than  
2 those of HTkA/B-like histones at both the transcript and protein level (Fig 1f) (36, 37).  
3 Together, they make up 0.37% of the measured exponential-phase proteome compared to  
4 0.66% for HTkB and 1.1% for HTkA. TK1040 was previously identified in *T. kodakarensis*  
5 chromatin fractions (38), suggesting a (direct or indirect) association with DNA. However,  
6 the same study estimated that less than 1% of the amount of chromatin-associated proteins  
7 were attributable to TK1040. We therefore consider it unlikely that these histones are global  
8 organizers of DNA similar to HTkA/B-like histones, but might modulate chromatin state,  
9 either locally or globally, in response to environmental change. In both *P. furiosus* and *T.*  
10 *kodakarensis*, the bacterial-type doublets are under the control of the heat shock regulator Phr  
11 (encoded by PF1790 and TK2291, respectively) and upregulated upon Phr deletion,  
12 suggesting a potential role in response to heat shock in these archaea (39, 40). The *T.*  
13 *kodakarensis* doublet is also downregulated at lower temperatures, similar to HTkA/B (11),  
14 further consistent with a role in temperature adaptation.

15  
16 Can these histone fold proteins interact with HTkA/B-like histones? We used AlphaFold (41)  
17 to predict the structure of combinations of HTkA, HTkB and the bacterial HF singlet from *T.*  
18 *kodakarensis*. Using this approach, all three are predicted to form homodimers and, as  
19 expected, HTkA and HTkB form a stable heterodimer. When a combination of either HTkA  
20 or HTkB and the bacterial singlet are used, AlphaFold also predicts that these will form a  
21 heterodimer (Fig 1g). The presence of non-HMf-like HF proteins in Thermococcales  
22 genomes adds to the potential functional diversity of histone-based chromatin in these species  
23 and may dynamically alter DNA accessibility at different stages of cell growth or in response  
24 to environmental challenges. Further experimental investigation is required, however, before  
25 meaningful conclusions can be drawn in this regard, including whether they do interact, both  
26 structurally and functionally, with the canonical HTkA/B-like histones.

27

28

## 29 **Methods**

30

### 31 *Identification of histones in Thermococcales genomes*

32

33 Protein sets, genomes and GFF files for all available genomes of class Thermococci were  
34 downloaded from GenBank (<https://www.ncbi.nlm.nih.gov/assembly>) using taxid 183968



1 [accessed on 2021-05-27]. Genomes not present in the GTDB tree  
2 (<https://gtdb.ecogenomic.org>, accessed 2021-08-01, see below) were removed. Two species  
3 which were annotated as Thermococci in NCBI but branched outside the main group on the  
4 GTDB tree were removed from the analysis, leaving a final set of 61 genomes, all from the  
5 order Thermococcales. Protein sequences were predicted using Prodigal v2.6.3 (42) where  
6 not provided through GenBank. Histone proteins were extracted from the protein sets through  
7 HMM searches using HMMER v3.3.1 (hmmsearch --noali) (43, 44) using Pfam models  
8 Cbfd\_nfyb\_hmf and DUF1931 (45) as well as a Jackhmmer searches using the singlet  
9 and doublet histones from bacteria as a seed used by others (28). Some proteins incorrectly  
10 identified as histones at this stage were manually filtered out.

11

### 12 *Classification of Thermococcales histones into HtkA-like and HtkB-like groups*

13

14 Hmf-like histones were aligned using MAFFT (46) (`--localpair --maxiterate 1000`). Histones  
15 were clustered based on amino acid composition of their peptide sequences using AAStats  
16 from the R package Seqinr (47). Histones which clustered with HTkA and HTkB were  
17 assigned HTkA- or HTkB-like status, respectively (see Fig 1a). 20 maximum likelihood  
18 phylogenetic trees were built using Raxml-NG (35) with the LG+G4 model of evolution as  
19 suggested by ModelTest-NG (48). The unrooted best maximum likelihood tree is shown. All  
20 trees were plotted using iTOL (49). Orthologous genes in the genomic neighbourhood of each  
21 histone were highlighted on the tree using Genespy as best reciprocal hits (50). Orthologs  
22 were identified by performing reciprocal best hits for each genome against *T. kodakarensis*  
23 using BLAST (51), retaining those which have a similarity score of >40% and are within  
24 20% length of one another (52). To generate sequence logos, histones were aligned using  
25 MAFFT (46) (`--localpair --maxiterate 1000`) and visualized using ggseqlogo in R (53).

26

### 27 *Predicted DNA binding and tetramerisation*

28

29 Predicted DNA-binding and interaction (tetramerization) strength between dimers for  
30 Thermococcales species was computed as in (18). In brief, sequences were aligned to HmfB  
31 and substitutions were mapped onto a tetrameric model of HmfB (extracted from PDB  
32 structure 5t5k) using FoldX (54) to generate models of homotetramers with DNA. Structures  
33 were then energy-minimised using AmberTools (55) and binding affinity was calculated

1 using an MMPBSA approach with the ff14SB forcefield (56).  $\Delta\Delta G$  was calculated relative to  
2 HMfB. The mean value for five replicates is shown for each model.

3

4

5 *Species tree*

6

7 The archaeal species tree was downloaded from GTDB (<https://gtdb.ecogenomic.org>) on  
8 2021-08-01.

9

10 *Expression data*

11

12 Expression data for *T. kodakarensis* was obtained from primary sources and NCBI's Gene  
13 Expression Omnibus (GEO) (57). Proteomics data from (36) was processed as in (11).

14 Protein abundance at 85°C is shown. Transcript abundance data was obtained from (37) and  
15 is shown as transcripts per million (TPM).

16

17 *Bacterial histone fold singlet and HTkA/B structure prediction*

18

19 The AlphaFold v2.0 (41) collab notebook

20 ([https://colab.research.google.com/github/deepmind/alphafold/blob/main/notebooks/AlphaFo](https://colab.research.google.com/github/deepmind/alphafold/blob/main/notebooks/AlphaFold.ipynb)  
21 [ld.ipynb](https://colab.research.google.com/github/deepmind/alphafold/blob/main/notebooks/AlphaFold.ipynb) accessed 18-08-21) was used to predict the structure of HTkA, HTkB and the

22 bacterial singlet HF protein (TK1040) as homodimers and all heterodimer combinations. The

23 MSA method used was jackhmmer, and models were ranked by PTMscore. The top model is

24 shown for all homodimers and heterodimers. Images shown were generated using UCSF,

25 ChimeraX developed by the Resource for Biocomputing, Visualization, and Informatics at

26 the University of California, San Francisco, with support from National Institutes of Health

27 (R01-GM129325) and the Office of Cyber Infrastructure and Computational Biology,

28 National Institute of Allergy and Infectious Diseases (58).

29

## 30 **References**

31

- 32 1. Talbert PB, Henikoff S. 2010. Histone variants - ancient wrap artists of the epigenome.  
33 Nat Rev Mol Cell Biol 11:264–275.

- 1 2. Martire S, Banaszynski LA. 2020. The roles of histone variants in fine-tuning  
2 chromatin organization and function. *Nat Rev Mol Cell Biol* 21:522–541.
- 3 3. Henikoff S, Smith MM. 2015. Histone variants and epigenetics. *Cold Spring Harb  
4 Perspect Biol* 7:a019364.
- 5 4. Bönisch C, Hake SB. 2012. Histone H2A variants in nucleosomes and chromatin:  
6 More or less stable? *Nucleic Acids Res* 40:10719–10741.
- 7 5. Palmer DK, O’Day K, Trong HLE, Charbonneau H, Margolis RL. 1991. Purification  
8 of the centromere-specific protein CENP-A and demonstration that it is a distinctive  
9 histone. *Proc Natl Acad Sci U S A* 88:3734–3738.
- 10 6. Sitbon D, Boyarchuk E, Dingli F, Loew D, Almouzni G. 2020. Histone variant H3.3  
11 residue S31 is essential for *Xenopus* gastrulation regardless of the deposition pathway.  
12 *Nat Commun* 11:1256.
- 13 7. Jang C, Shibata Y, Starmer J, Yee D, Magnuson T. 2015. Histone H3.3 maintains  
14 genome integrity during mammalian development. *Genes Dev* 29:1377–1392.
- 15 8. Starich MR, Sandman K, Reeve JN, Summers MF. 1996. NMR structure of HMfB  
16 from the hyperthermophile, *Methanothermus fervidus*, confirms that this archaeal  
17 protein is a histone. *J Mol Biol* 255:187–203.
- 18 9. Sandman K, Krzycki JA, Dobrinski B, Lurz R, Reeve JN. 1990. HMf, a DNA-binding  
19 protein isolated from the hyperthermophilic archaeon *Methanothermus fervidus*, is  
20 most closely related to histones. *Proc Natl Acad Sci* 87:5788–5791.
- 21 10. Henneman B, van Emmerik C, van Ingen H, Dame RT. 2018. Structure and function  
22 of archaeal histones. *PLoS Genet* 14:e1007582.
- 23 11. Hocher A, Borrel G, Fadhloui K, Brugère JF, Gribaldo S, Warnecke T. 2021. Growth  
24 temperature is the principal driver of chromatinization in archaea. *BioRxiv*  
25 <https://doi.org/https://doi.org/10.1101/2021.07.08.451601>.
- 26 12. Rojec M, Hocher A, Stevens KM, Merckenschlager M, Warnecke T. 2019.  
27 Chromatinization of *Escherichia coli* with archaeal histones. *Elife* 8:e49038.
- 28 13. Nalabothula N, Xi L, Bhattacharyya S, Widom J, Wang JP, Reeve JN, Santangelo TJ,  
29 Fondufe-Mittendorf YN. 2013. Archaeal nucleosome positioning in vivo and in vitro is  
30 directed by primary sequence motifs. *BMC Genomics* 14:391.
- 31 14. Bailey KA, Pereira SL, Widom J, Reeve JN. 2000. Archaeal histone selection of  
32 nucleosome positioning sequences and the prokaryotic origin of histone-dependent  
33 genome evolution. *J Mol Biol* 303:25–34.
- 34 15. Decanniere K, Babu AM, Sandman K, Reeve JN, Heinemann U. 2000. Crystal

- 1 structures of recombinant histones HMfA and HMfB from the hyperthermophilic  
2 archaeon *Methanothermus fervidus*. *J Mol Biol* 303:35–47.
- 3 16. Mattioli F, Bhattacharyya S, Dyer PN, White AE, Sandman K, Burkhart BW, Byrne  
4 KR, Lee T, Ahn NG, Santangelo TJ, Reeve JN, Luger K. 2017. Structure of histone-  
5 based chromatin in Archaea. *Science* 357:609–612.
- 6 17. Bowerman S, Wereszczynski J, Luger K. 2021. Archaeal chromatin ‘slinkies’ are  
7 inherently dynamic complexes with deflected dna wrapping pathways. *Elife*  
8 10:e65587.
- 9 18. Stevens KM, Swadling JB, Hocher A, Bang C, Gribaldo S, Schmitz RA, Warnecke T.  
10 2020. Histone variants in archaea and the evolution of combinatorial chromatin  
11 complexity. *Proc Natl Acad Sci U S A* 117:33384–33395.
- 12 19. Bailey KA, Marc F, Sandman K, Reeve JN. 2002. Both DNA and histone fold  
13 sequences contribute to archaeal nucleosome stability. *J Biol Chem* 277:9293–9301.
- 14 20. Sandman K, Grayling RA, Dobrinski B, Lurz R, Reeve JN. 1994. Growth-phase-  
15 dependent synthesis of histones in the archaeon *Methanothermus fervidus*. *Proc Natl*  
16 *Acad Sci* 91:12624–12628.
- 17 21. Henneman B, Brouwer TB, Erkelens AM, Kuijntjes GJ, Van Emmerik C, Van Der  
18 Valk RA, Timmer M, Kirolos NCS, Van Ingen H, Van Noort J, Dame RT. 2021.  
19 Mechanical and structural properties of archaeal hypernucleosomes. *Nucleic Acids Res*  
20 49:4338–4349.
- 21 22. Sanders TJ, Ullah F, Gehring AM, Burkhart BW, Vickerman RL, Fernando S, Gardner  
22 AF, Ben-Hur A, Santangelo TJ. 2021. Extended Archaeal Histone-Based Chromatin  
23 Structure Regulates Global Gene Expression in *Thermococcus kodakarensis*. *Front*  
24 *Microbiol* 12:1071.
- 25 23. Maruyama H, Harwood JC, Moore KM, Paszkiewicz K, Durley SC, Fukushima H,  
26 Atomi H, Takeyasu K, Kent NA. 2013. An alternative beads-on-a-string chromatin  
27 architecture in *Thermococcus kodakarensis*. *EMBO Rep* 14:711–717.
- 28 24. Sanders TJ, Lammers M, Marshall CJ, Walker JE, Lynch ER, Santangelo TJ. 2019.  
29 TFS and Spt4/5 accelerate transcription through archaeal histone-based chromatin.  
30 *Mol Microbiol* 111:784–797.
- 31 25. Higashibata H, Fujiwara S, Takagi M, Imanaka T. 1999. Analysis of DNA compaction  
32 profile and intracellular contents of archaeal histones from *Pyrococcus kodakaraensis*  
33 KOD1. *Biochem Biophys Res Commun* 258:416–424.
- 34 26. Čuboňová L, Katano M, Kanai T, Atomi H, Reeve JN, Santangelo TJ. 2012. An

- 1 archaeal histone is required for transformation of *Thermococcus kodakarensis*. *J*  
2 *Bacteriol* 194:6864–6874.
- 3 27. Wolfe JM, Fournier GP. 2018. Horizontal gene transfer constrains the timing of  
4 methanogen evolution. *Nat Ecol Evol* 2:897–903.
- 5 28. Alva V, Lupas AN. 2019. Histones Predate the Split Between Bacteria and Archaea.  
6 *Bioinformatics* 35:2349–2353.
- 7 29. Henneman B. 2019. PhD Thesis. Leiden University, Leiden. Histone-DNA assemblies  
8 in archaea: shaping the genome on the edge of life.
- 9 30. Soares DJ, Sandman K, Reeve JN. 2000. Mutational analysis of archaeal histone-DNA  
10 interactions. *J Mol Biol* 297:39–47.
- 11 31. Li WT, Shriver JW, Reeve JN. 2000. Mutational analysis of differences in  
12 thermostability between histones from mesophilic and hyperthermophilic archaea. *J*  
13 *Bacteriol* 182:812–817.
- 14 32. Alpha-Bazin B, Gorlas A, Lagorce A, Joulié D, Boyer JB, Dutertre M, Gaillard JC,  
15 Lopes A, Zivanovic Y, Dedieu A, Confalonieri F, Armengaud J. 2021. Lysine-specific  
16 acetylated proteome from the archaeon *Thermococcus gammatolerans* reveals the  
17 presence of acetylated histones. *J Proteomics* 232:1–11.
- 18 33. Sandman K, Soares D, Reeve JN. 2001. Molecular components of the archaeal  
19 nucleosome. *Biochimie* 83:277–281.
- 20 34. Marc F, Sandman K, Lurz R, Reeve JN. 2002. Archaeal histone tetramerization  
21 determines DNA affinity and the direction of DNA supercoiling. *J Biol Chem*  
22 277:30879–30886.
- 23 35. Kozlov AM, Darriba D, Flouri T, Morel B, Stamatakis A. 2019. RAxML-NG: A fast,  
24 scalable and user-friendly tool for maximum likelihood phylogenetic inference.  
25 *Bioinformatics* 35:4453–4455.
- 26 36. Sas-Chen A, Thomas JM, Matzov D, Taoka M, Nance KD, Nir R, Bryson KM,  
27 Shachar R, Liman GLS, Burkhart BW, Gamage ST, Nobe Y, Briney CA, Levy MJ,  
28 Fuchs RT, Robb GB, Hartmann J, Sharma S, Lin Q, Florens L, Washburn MP, Isobe  
29 T, Santangelo TJ, Shalev-Benami M, Meier JL, Schwartz S. 2020. Dynamic RNA  
30 acetylation revealed by quantitative cross-evolutionary mapping. *Nature* 583:638–643.
- 31 37. Jäger D, Förstner KU, Sharma CM, Santangelo TJ, Reeve JN. 2014. Primary  
32 transcriptome map of the hyperthermophilic archaeon *Thermococcus kodakarensis*.  
33 *BMC Genomics* 15:684.
- 34 38. Maruyama H, Shin M, Oda T, Matsumi R, Ohniwa RL, Itoh T, Shirahige K, Imanaka

- 1 T, Atomi H, Yoshimura SH, Takeyasu K. 2011. Histone and TK0471/TrmBL2 form a  
2 novel heterogeneous genome architecture in the hyperthermophilic archaeon  
3 *Thermococcus kodakarensis*. *Mol Biol Cell* 22:386–398.
- 4 39. Kanai T, Takedomi S, Fujiwara S, Atomi H, Imanaka T. 2010. Identification of the  
5 Phr-dependent heat shock regulon in the hyperthermophilic archaeon, *Thermococcus*  
6 *kodakaraensis*. *J Biochem* 147:361–370.
- 7 40. Keese AM, Schut GJ, Ouhammouch M, Adams MWW, Thomm M. 2010. Genome-  
8 wide identification of targets for the archaeal heat shock regulator Phr by cell-free  
9 transcription of genomic DNA. *J Bacteriol* 192:1292–1298.
- 10 41. Jumper J, Evans R, Pritzel A, Green T, Figurnov M, Ronneberger O, Tunyasuvunakool  
11 K, Bates R, Židek A, Potapenko A, Bridgland A, Meyer C, Kohl SAA, Ballard AJ,  
12 Cowie A, Romera-Paredes B, Nikolov S, Jain R, Adler J, Back T, Petersen S, Reiman  
13 D, Clancy E, Zielinski M, Steinegger M, Pacholska M, Berghammer T, Bodenstein S,  
14 Silver D, Vinyals O, Senior AW, Kavukcuoglu K, Kohli P, Hassabis D. 2021. Highly  
15 accurate protein structure prediction with AlphaFold. *Nature* 596:583–589.
- 16 42. Hyatt D, Chen GL, LoCascio PF, Land ML, Larimer FW, Hauser LJ. 2010. Prodigal:  
17 Prokaryotic gene recognition and translation initiation site identification. *BMC*  
18 *Bioinformatics* 11:119.
- 19 43. Eddy SR. 2011. Accelerated Profile HMM Searches. *PLoS Comput Biol* 7:e1002195.
- 20 44. Finn RD, Clements J, Eddy SR. 2011. HMMER web server: Interactive sequence  
21 similarity searching. *Nucleic Acids Res* 39:29–37.
- 22 45. Finn RD, Bateman A, Clements J, Coggill P, Eberhardt RY, Eddy SR, Heger A,  
23 Hetherington K, Holm L, Mistry J, Sonnhammer ELL, Tate J, Punta M. 2014. Pfam:  
24 The protein families database. *Nucleic Acids Res* 42:222–230.
- 25 46. Katoh K, Standley DM. 2013. MAFFT multiple sequence alignment software version  
26 7: Improvements in performance and usability. *Mol Biol Evol* 30:772–780.
- 27 47. Charif D, Lobry JR. 2007. SeqinR 1.0-2: a contributed package to the R project for  
28 statistical computing devoted to biological sequences retrieval and analysis., p. 207–  
29 232. *In* Bastolla, U, Porto, M, Roman, HE, Vendruscolo, M (eds.), *Structural*  
30 *approaches to sequence evolution: Molecules, networks, populations*. Springer Verlag,  
31 New York.
- 32 48. Darriba Di, Posada D, Kozlov AM, Stamatakis A, Morel B, Flouri T. 2020.  
33 ModelTest-NG: A New and Scalable Tool for the Selection of DNA and Protein  
34 Evolutionary Models. *Mol Biol Evol* 37:291–294.

- 1 49. Letunic I, Bork P. 2019. Interactive Tree of Life (iTOL) v4: Recent updates and new  
2 developments. *Nucleic Acids Res* 47:256–259.
- 3 50. Garcia PS, Jauffrit F, Grangeasse C, Brochier-Armanet C. 2019. GeneSpy, a user-  
4 friendly and flexible genomic context visualizer. *Bioinformatics* 35:329–331.
- 5 51. Altschul SF, Gish W, Miller W, Myers EW, Lipman DJ. 1990. Basic local alignment  
6 search tool. *J Mol Biol* 215:403–410.
- 7 52. Rocha EPC. 2006. Inference and analysis of the relative stability of bacterial  
8 chromosomes. *Mol Biol Evol* 23:513–522.
- 9 53. Wagih O. 2017. ggseqlogo: A versatile R package for drawing sequence logos.  
10 *Bioinformatics* 33:3645–3647.
- 11 54. Schymkowitz J, Borg J, Stricher F, Nys R, Rousseau F, Serrano L. 2005. The FoldX  
12 web server: An online force field. *Nucleic Acids Res* 33:W382–W388.
- 13 55. Maier JA, Martinez C, Kasavajhala K, Wickstrom L, Hauser KE, Simmerling C. 2015.  
14 ff14SB: Improving the Accuracy of Protein Side Chain and Backbone Parameters from  
15 ff99SB. *J Chem Theory Comput* 11:3696–3713.
- 16 56. Miller BR, McGee TD, Swails JM, Homeyer N, Gohlke H, Roitberg AE. 2012.  
17 MMPBSA.py: An efficient program for end-state free energy calculations. *J Chem*  
18 *Theory Comput* 8:3314–3321.
- 19 57. Barrett T, Wilhite SE, Ledoux P, Evangelista C, Kim IF, Tomashevsky M, Marshall  
20 KA, Phillippy KH, Sherman PM, Holko M, Yefanov A, Lee H, Zhang N, Robertson  
21 CL, Serova N, Davis S, Soboleva A. 2013. NCBI GEO: Archive for functional  
22 genomics data sets - Update. *Nucleic Acids Res* 41:991–995.
- 23 58. Pettersen EF, Goddard TD, Huang CC, Meng EC, Couch GS, Croll TI, Morris JH,  
24 Ferrin TE. 2021. UCSF ChimeraX: Structure visualization for researchers, educators,  
25 and developers. *Protein Sci* 30:70–82.
- 26  
27  
28  
29

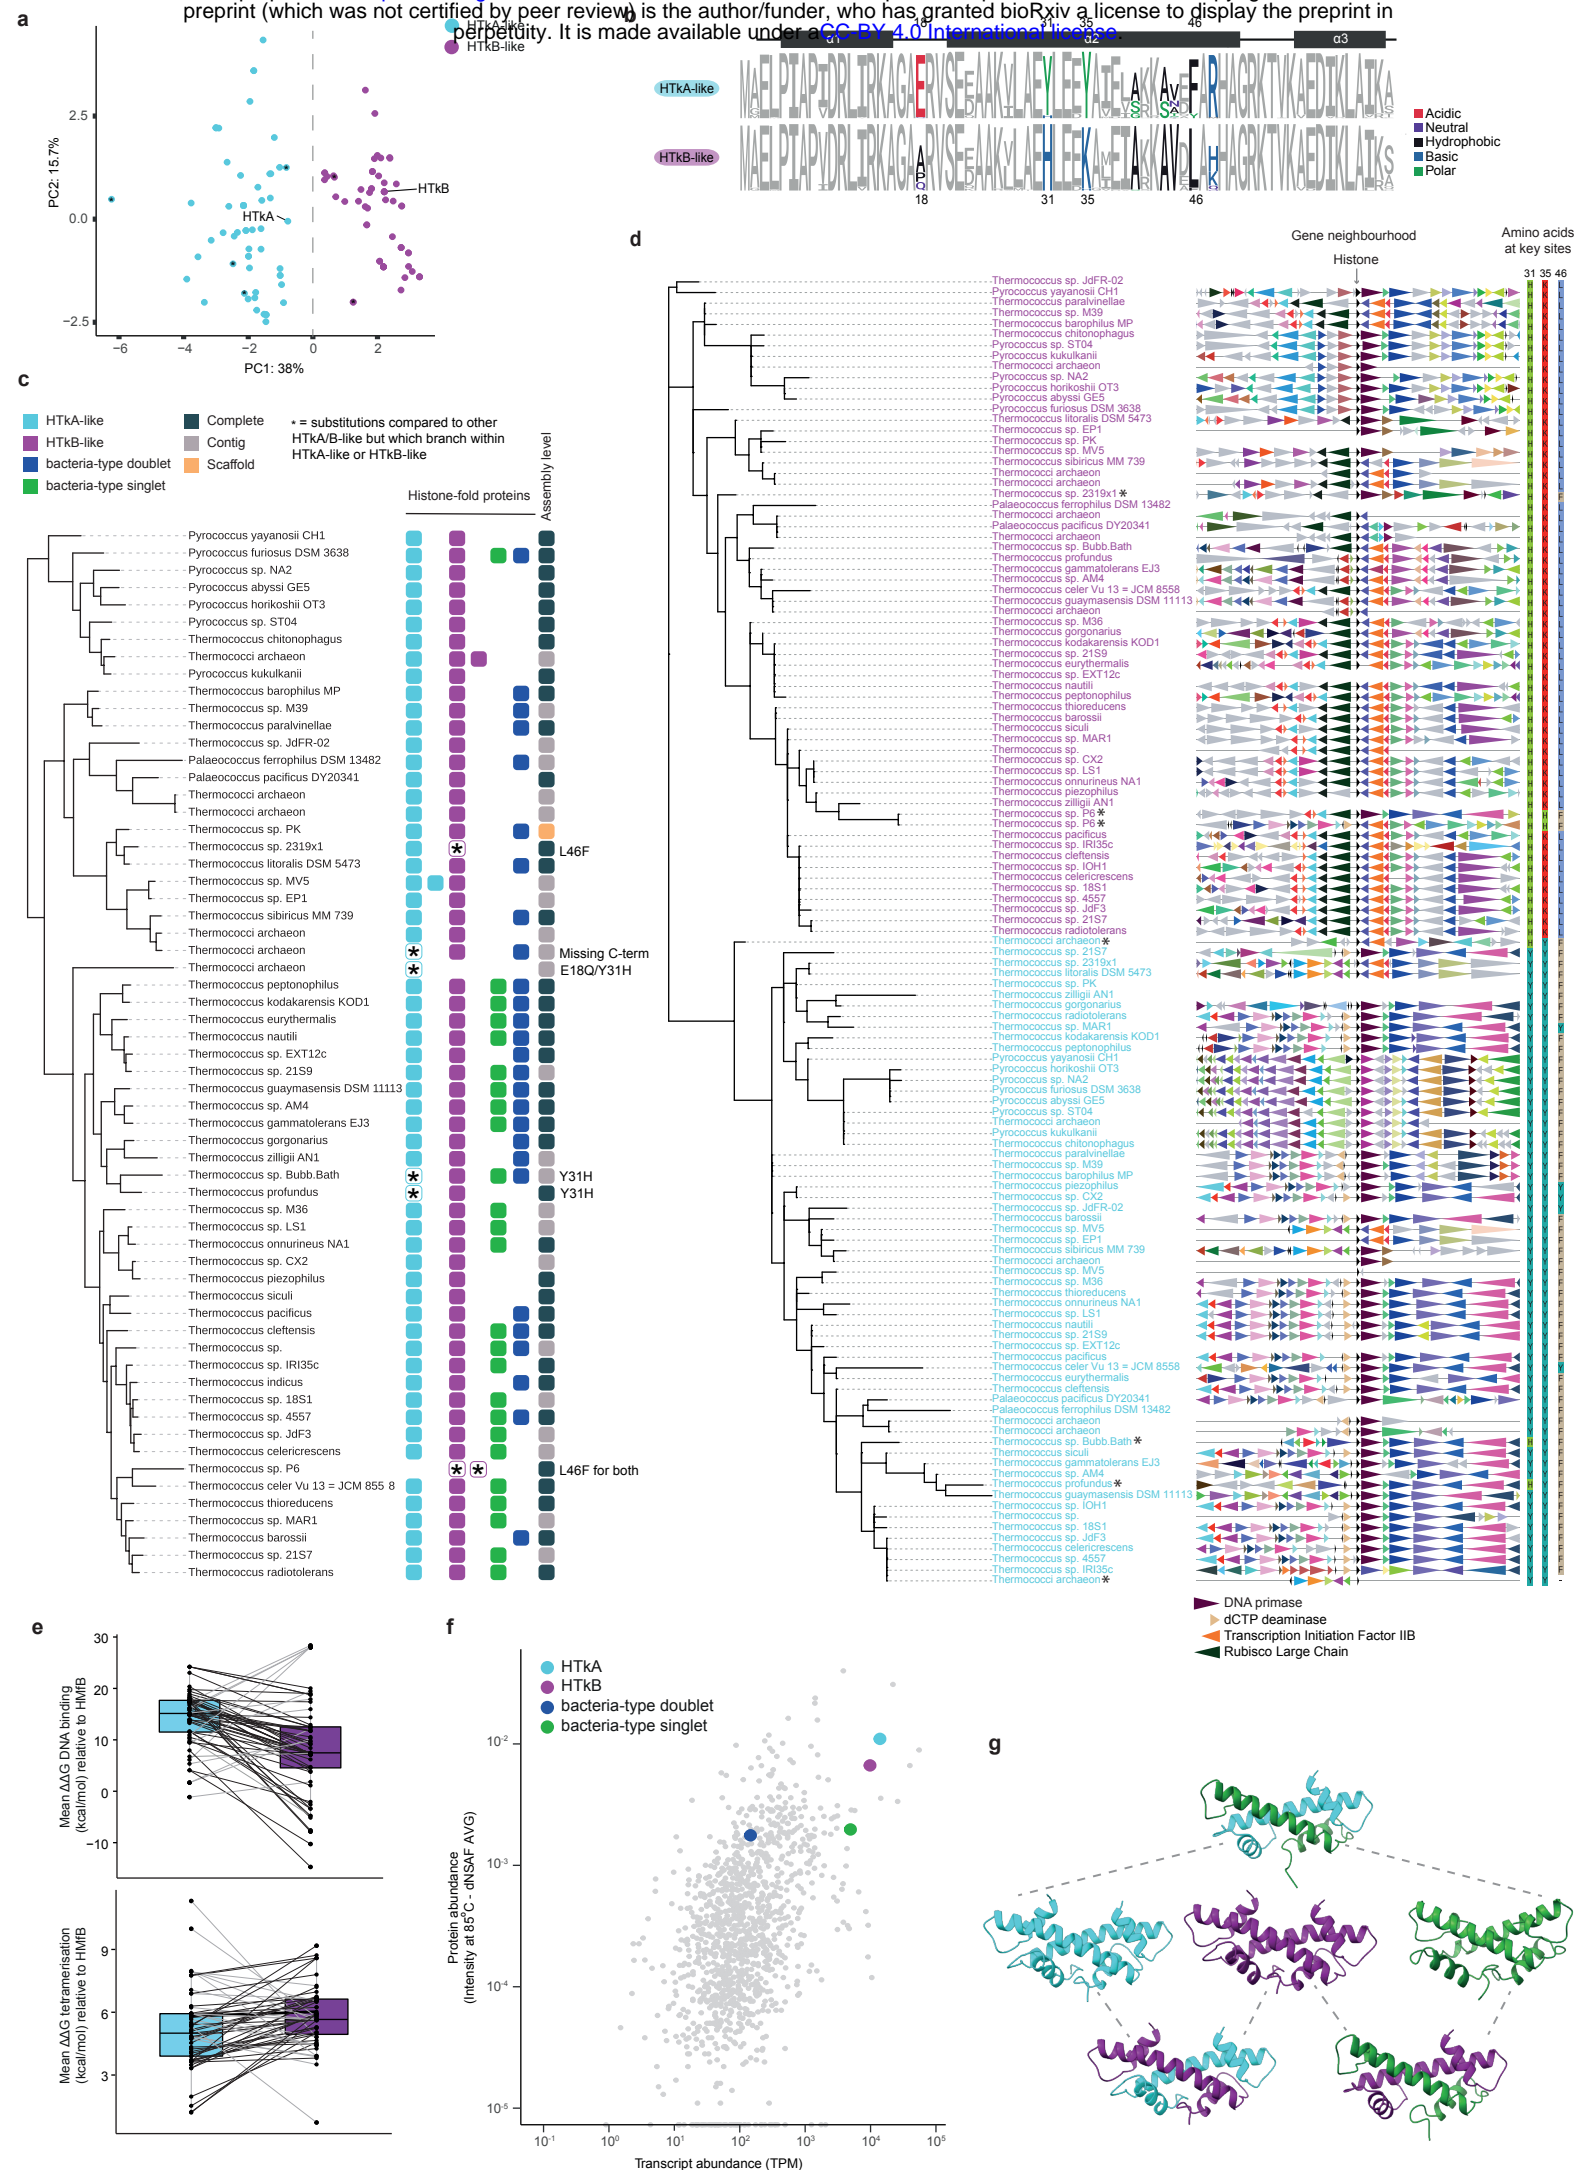



**Figure 1. a.** Principle component analysis of Thermococcales HMF-like histones based on amino acid properties (AAStats, see Methods). Histones that cluster with either HTkA or HTkB along the first principal component are coloured accordingly (HTkA-like histones in blue, HTkB-like in purple). Histones with substitutions at discriminative positions (see panel b) are highlighted with an asterisk. **b.** Sequence logos showing amino acid composition of HTkA- and HTkB-like histones across 61 Thermococcales. Amino acids that differ noticeably between the two groups are coloured. Positions are numbered relative to HMfB from *Methanothermus fervidus* to facilitate comparison with prior studies. Residues with known functional importance in archaea from previous experiments are highlighted on the secondary structure cartoon as in (16) **c.** Protein-level phylogenetic tree of all HMF-like Thermococcales histones. Genes in the neighbourhood are coloured to indicate ortholog identity (see Methods). Note that, while the gene neighbourhood is broadly conserved for HTkA- vis-à-vis HTkB-like orthologs, some HTkB-like genes (e.g. in *Thermococcus chitonophagus*) have a 3' neighbourhood normally found for HTkA. This is owing to a large genomic rearrangement event in which HTkB served as the breakpoint (not shown). **d.** GTDB species tree for all Thermococcales in the dataset indicating presence/absence of histones of a particular type in each genome. Each square represents one histone and is coloured by histone type. **e.** Predicted DNA binding affinity (top) and tetramer stability (bottom) for HTkA/B-like paralogs. Lines connect paralogs from the same genome. **f.** Protein and transcript abundance (see Methods) of genes in *T. kodakarensis*. TPM: transcripts per million. **g.** AlphaFold-predicted homodimeric structures of TK1040 (green), HTkA (light blue) and HTkB (purple) and heterodimers of HTkA and HTkB (light blue/purple), HTkA and TK1040 (light blue/green), and HTkB and TK1040 (purple/green).
